# Supplementary material for: Reactive Sulfur Species Interact with Other Signal Molecules in Root Nodule Symbiosis in Lotus japonicus
Source: MDPI journal article supplement (doi:10.3390/antiox9020145), 2020-02-07

# Supplemental Figure S1

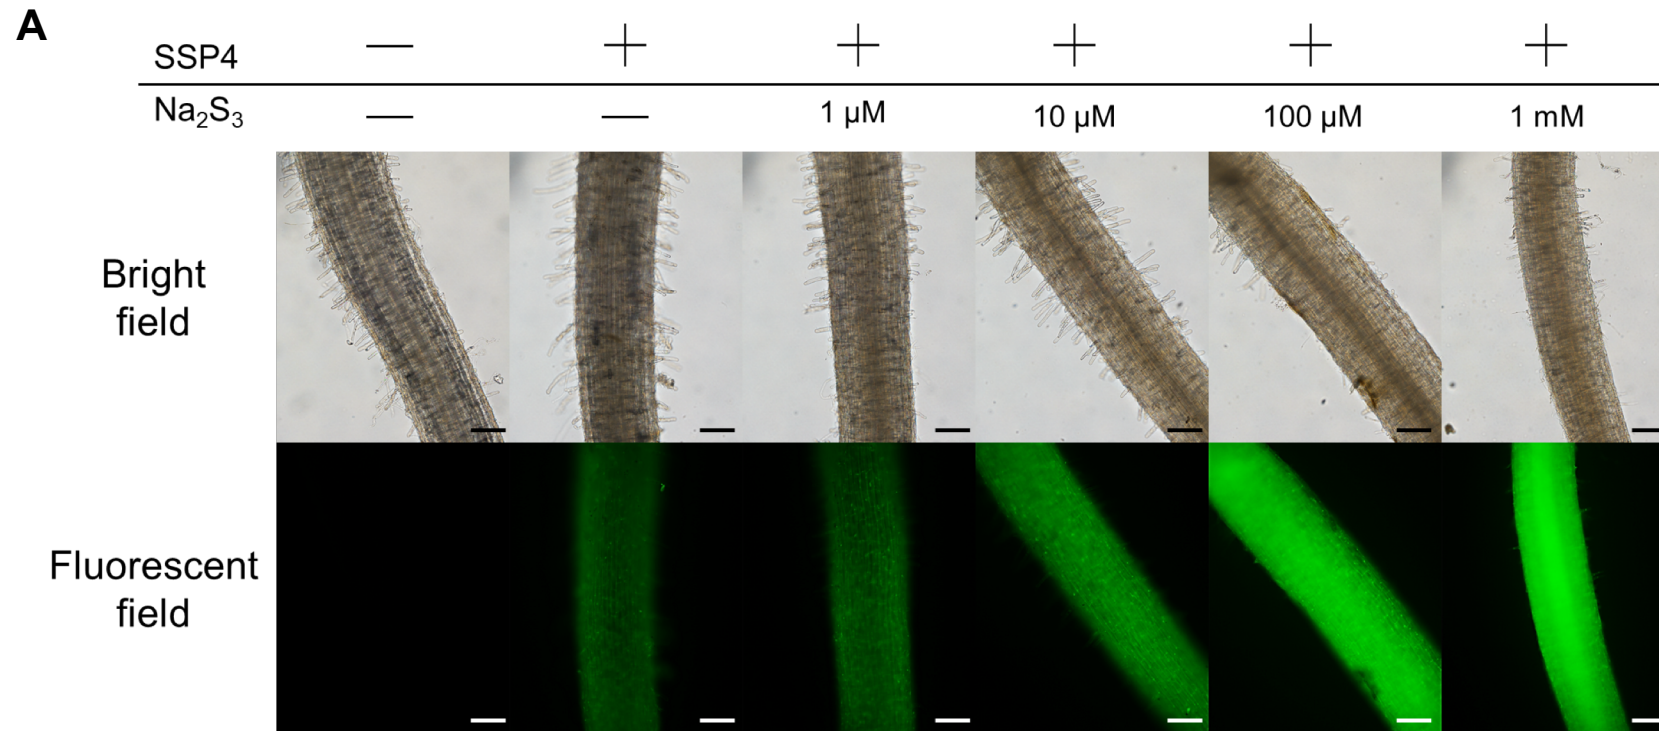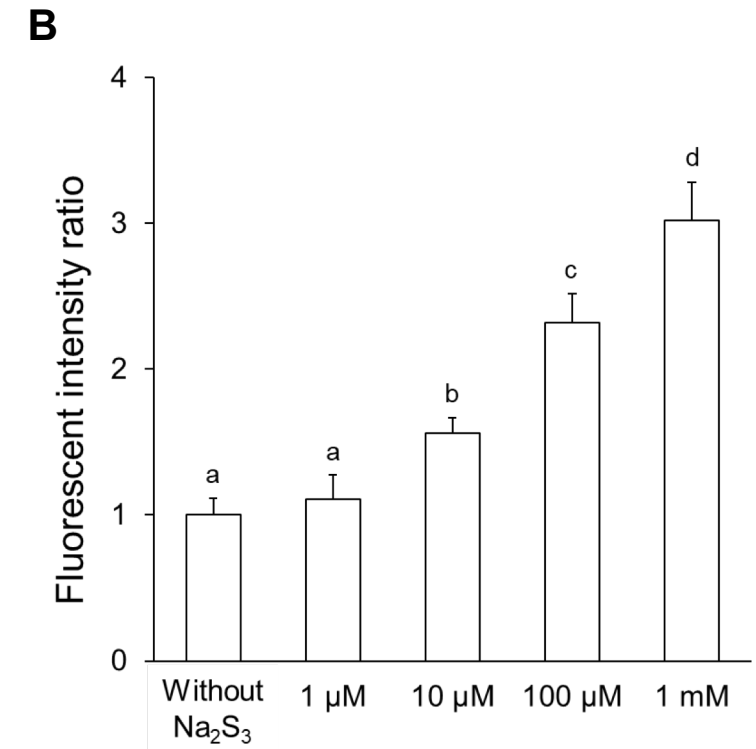

# Supplemental Figure S2

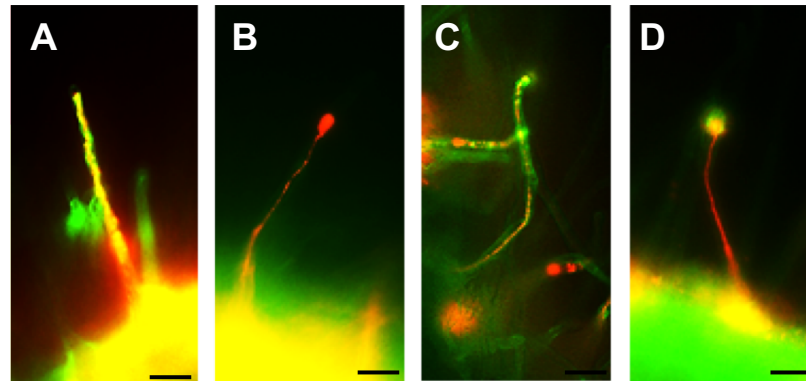

# Supplemental Figure S3

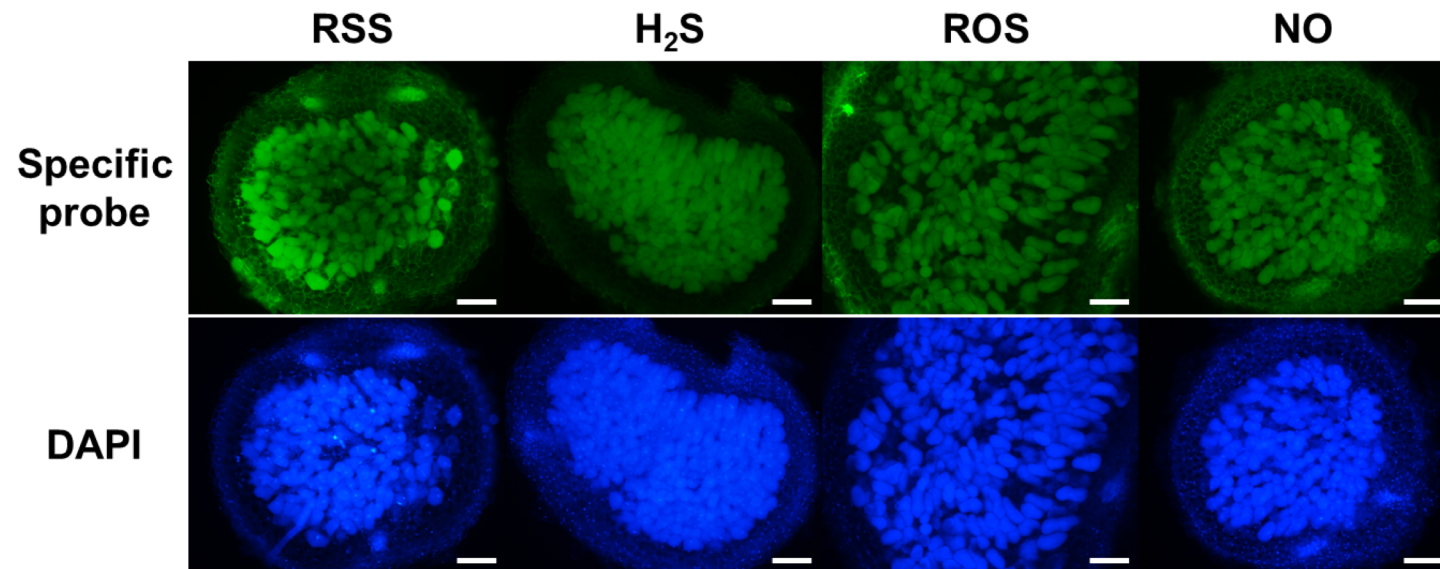

Supplement: s1 [file s1]
